# Supplementary material for: Comparative Study of the Antimicrobial Effects of Tungsten Nanoparticles and Tungsten Nanocomposite Fibres on Hospital Acquired Bacterial and Viral Pathogens
Source: MDPI journal article supplement (doi:10.3390/nano10061017), 2020-05-26

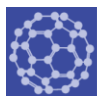

Supplementary Material

# Comparative Study of the Antimicrobial Effects of Tungsten Nanoparticles and Tungsten Nanocomposite Fibres on Hospital Acquired Bacterial and Viral Pathogens

Rupy Kaur Matharu <sup>1,2</sup>, Lena Ciric <sup>2</sup>, Guogang Ren <sup>3</sup> and Mohan Edirisinghe <sup>1,\*</sup>

<sup>1</sup> Department of Mechanical Engineering, University College London, Torrington Place, London, WC1E 7JE, UK; rupy.matharu.15@ucl.ac.uk

<sup>2</sup> Department of Civil, Environmental & Geomatic Engineering, University College London, Chadwick Building, Gower Street, London, WC1E 6BT, UK; l.ciric@ucl.ac.uk

<sup>3</sup> School of Engineering and Technology, University of Hertfordshire, Hatfield AL10 9AB, UK; g.g.ren@herts.ac.uk

\* Correspondence: m.edirisinghe@ucl.ac.uk

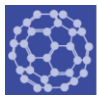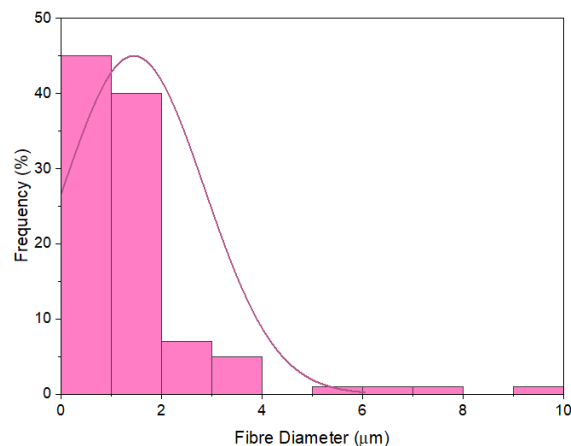

(a)

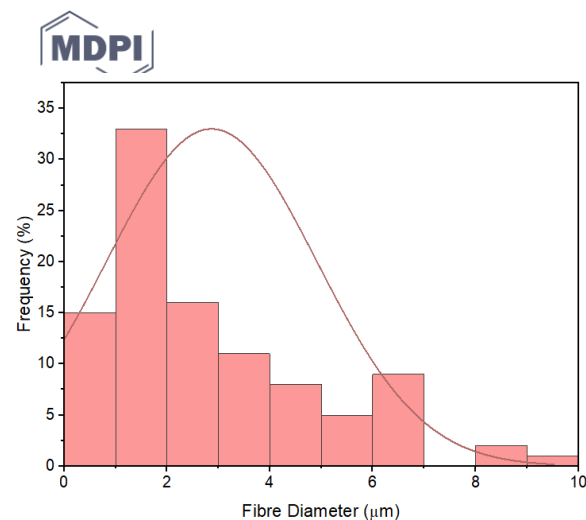

(b)

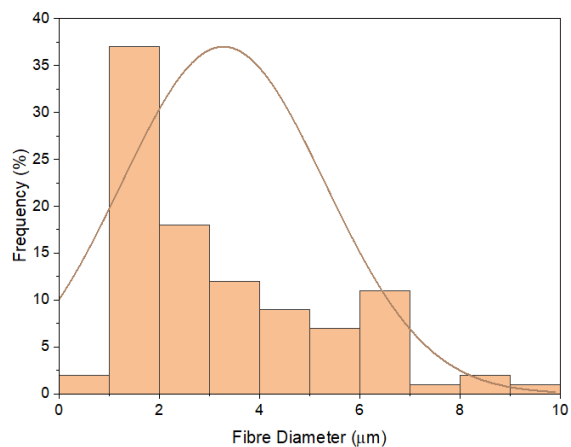

(c)

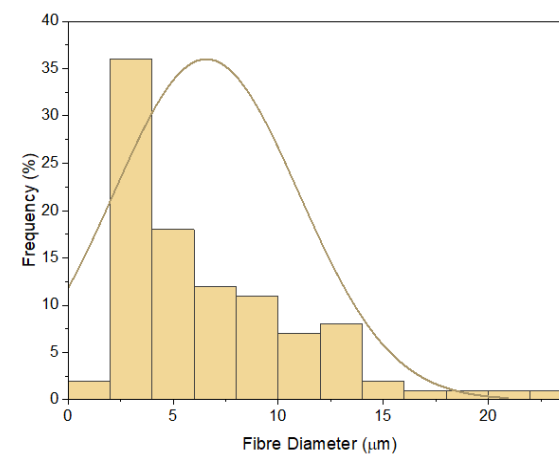

(d)

**Figure S1.** Histograms showing the diameter distribution of the formed fibres: (a) pure PMMA fibres; (b) PMMA fibres with 2 wt %  $\text{WO}_3$ ; (c) PMMA fibres with 4 wt %  $\text{WO}_3$ ; (d) PMMA fibres with 8 wt % of  $\text{WO}_3$ .

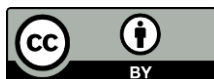

Supplement: s1 [file s1]
